# Supplementary material for: Ion-mediated self-assembly of Cys-capped quantum dots for fluorescence detection of As(iii) in water
Source: Royal Society of Chemistry journal article supplement (doi:10.1039/d0ay01144d), 2020-01-01
Supplement: d0ay01144d1.pdf [file d0ay01144d1.pdf]

## Supporting Information

### Ions-mediated self-assembly of Cys-capped quantum dots for fluorescent detection of As (III) in water†

Yingben Wu,<sup>a,†\*</sup> Yan Liu, <sup>‡b</sup> Huizhi Liu,<sup>a</sup> Biao Liu,<sup>a</sup> Wei Chen,<sup>a</sup> Lijuan Xu,<sup>a</sup> Jianbo Liu<sup>\*b</sup>

<sup>a</sup> Hunan Province Microbiology Institute, Changsha, Hunan. 410009. P. R. China. Email: wuyingben@163.com.

<sup>b</sup> State Key Laboratory of Chemo/Biosensing and Chemometrics, College of Chemistry and Chemical Engineering, Key Laboratory for Bio-Nanotechnology and Molecular Engineering of Hunan Province, Hunan University, Changsha, Hunan 410082, P. R. China. Email: liujianbo@hnu.edu.cn

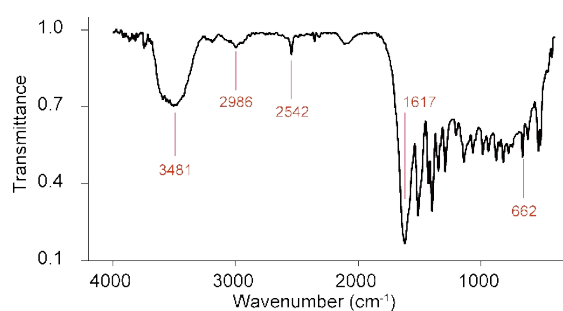

**Figure S1.** FTIR spectra of Cys-QDs showing L-cysteine capping.

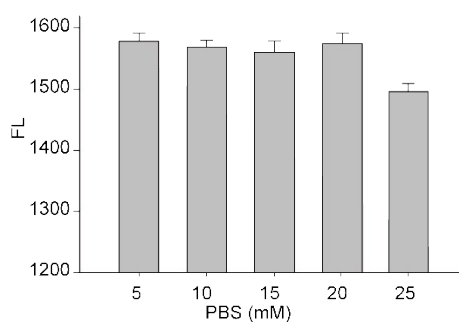

**Figure S2.** Fluorescent intensity of QDs at different concentration of PBS buffer (pH 7.4), [QDs]=60 nM.
